# Supplementary material for: Antibacterial activity of copper pyrazolate coordination polymers
Source: Royal Society of Chemistry journal article supplement (doi:10.1039/d3nj02378h), 2023-01-01
Supplement: d3nj02378h1.pdf [file d3nj02378h1.pdf]

## Electronic Supplementary Information

# Antibacterial Activity of Copper Pyrazolate Coordination Polymers

Corrado Di Nicola,<sup>\*a</sup> Fabio Marchetti,<sup>a</sup> Alessia Tombesi,<sup>b</sup> Sonila Xhafa,<sup>a</sup> Patrizio Campitelli,<sup>a</sup> Marco Moroni,<sup>c,d</sup> Simona Galli,<sup>c,e</sup> Riccardo Pettinari,<sup>b</sup> Claudio Pettinari<sup>b</sup>

<sup>a</sup> ChIP Research Center, School of Science and Technology, University of Camerino, via Madonna delle Carceri, 62032 Camerino MC, Italy.

<sup>b</sup> ChIP Research Center, School of Pharmacy, University of Camerino, via Madonna delle Carceri, 62032 Camerino MC, Italy.

<sup>c</sup> Dipartimento di Scienza e Alta Tecnologia, Università degli Studi dell'Insubria, Via Valleggio 9, 22100 Como, Italy.

<sup>d</sup> Dipartimento di Chimica, Università degli Studi di Pavia, Via Taramelli 16, 27100 Pavia, Italy.

<sup>e</sup> Consorzio Interuniversitario Nazionale per la Scienza e Tecnologia dei Materiali, Via Giusti 9, 50121 Firenze, Italy.

Index:

- Figure S1.** IR spectra of **2** (blue) and **5** (black). Pag. S2
- Figure S2.** TGA curves of **2** (blue), **5** (black) and **5** after thermal treatment at 433 K for 1 h (red). Pag. S2
- Figure S3.** IR spectra of **2** (blue) and **5** after heating at 433 K for 1h (orange). The two spectra are superimposable, confirming the transformation of **5** in **2** after the thermal treatment. Pag. S3
- Figure S4.** Graphical result of the final structure refinement carried out with the Rietveld method on the PXRD pattern of **2** in terms of experimental, calculated and difference traces (blue, red and grey, respectively). The green markers at the bottom indicate the positions of the Bragg reflections. Pag. S3
- Figure S5.** Graphical result of the whole powder pattern refinement carried out with the Le Bail approach on the PXRD pattern of **5** in terms of experimental, calculated and difference traces (blue, red and grey, respectively). The green markers at the bottom indicate the positions of the Bragg reflections. Pag. S4
- Figure S6.** Antibacterial activity of the pyrazole ligands against *E. coli* (up), *S. aureus* (down) Pag. S5

## Supporting Information

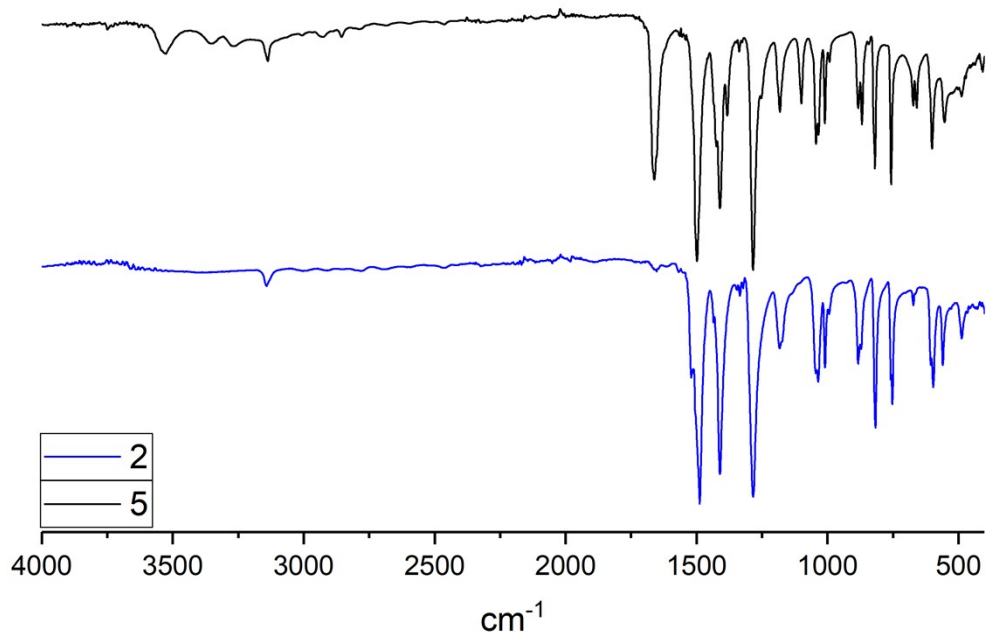

Figure S1. IR spectra of **2** (blue) and **5** (black).

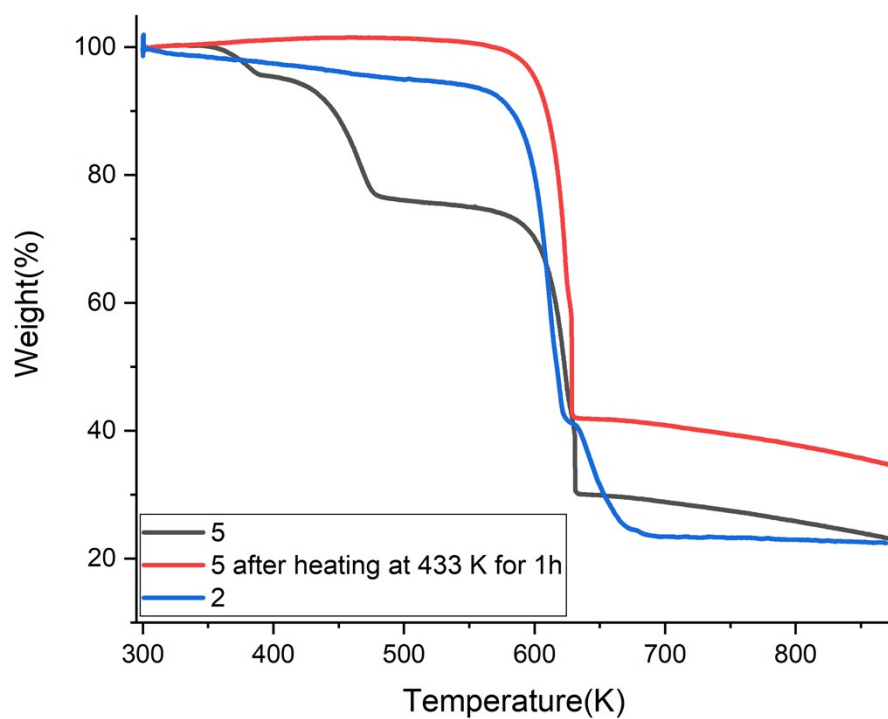

Figure S2. TGA curves of **2** (blue), **5** (black) and **5** after thermal treatment at 433 K for 1 h (red).

## Supporting Information

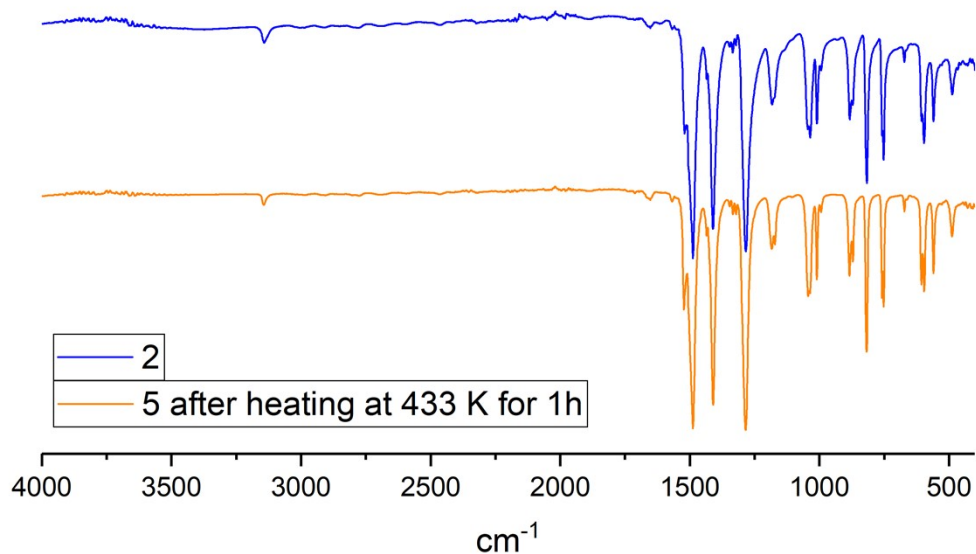

**Figure S3.** IR spectra of **2** (blue) and **5** after heating at 433 K for 1h (orange). The two spectra are superimposable, confirming the transformation of **5** in **2** after the thermal treatment.

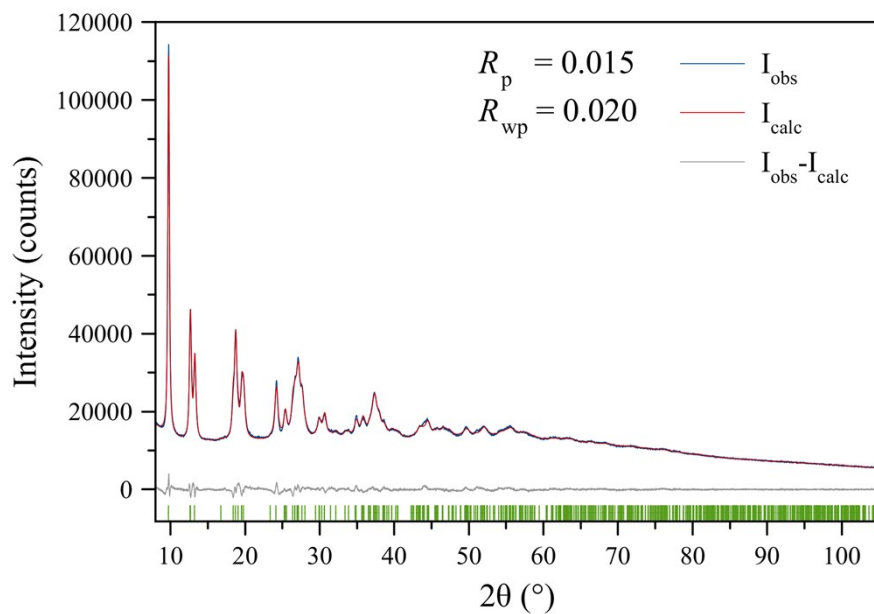

**Figure S4.** Graphical result of the final structure refinement carried out with the Rietveld method on the PXRD pattern of **2** in terms of experimental, calculated and difference traces (blue, red and grey, respectively). The green markers at the bottom indicate the positions of the Bragg reflections.

## Supporting Information

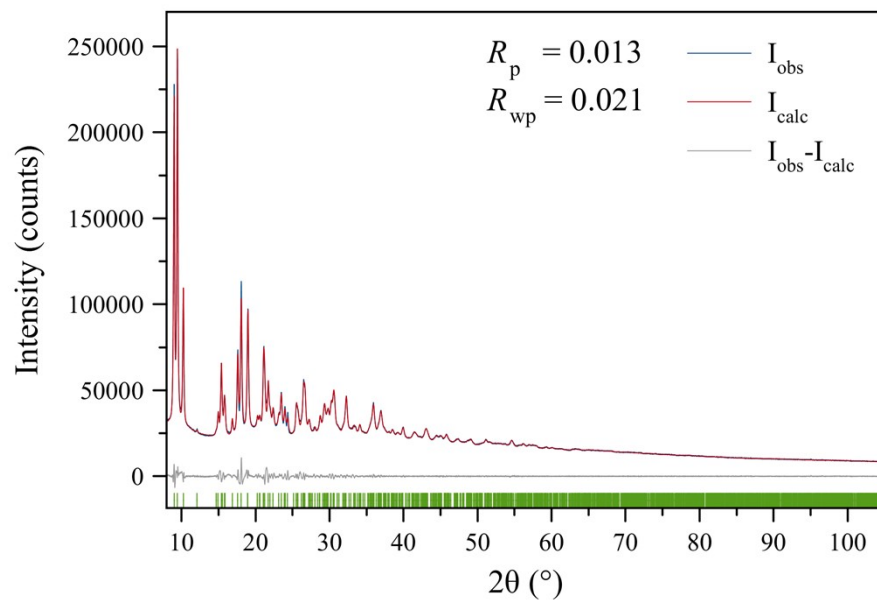

**Figure S5.** Graphical result of the whole powder pattern refinement carried out with the Le Bail approach on the PXRD pattern of **5** in terms of experimental, calculated and difference traces (blue, red and grey, respectively). The green markers at the bottom indicate the positions of the Bragg reflections.

# Supporting Information

## *Escherichia coli*

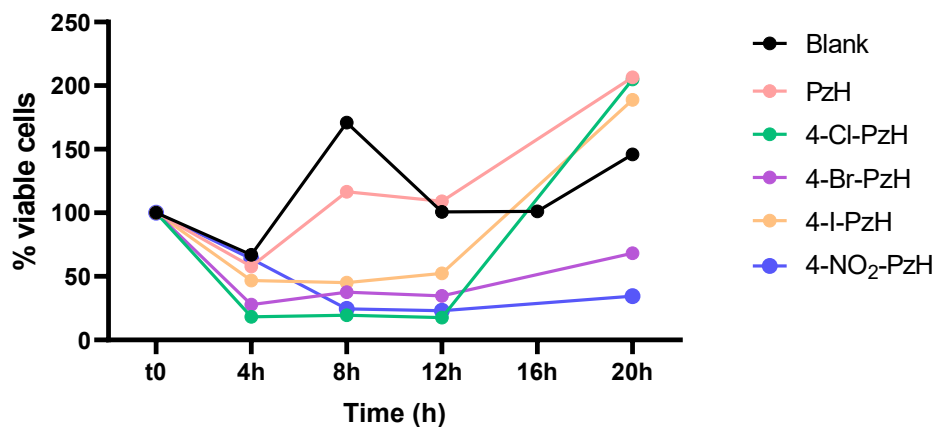

## *Staphylococcus aureus*

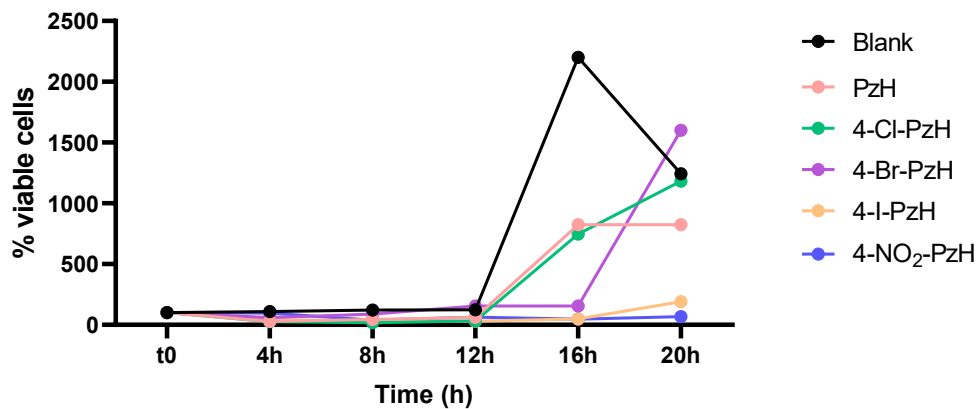

Figure S6. Antibacterial activity of the pyrazole ligands against *E. coli* (up), *S. aureus* (down).
